# Supplementary material
Source: Springer Nature journal article supplement (https://www.springermedizin.de/resource/supplementary/13022_2012_59_MOESM2_ESM.pdf/9641422)
Supplement: MOESM2 [file 9641422]

# Gastroduodenal Artery Aneurysm

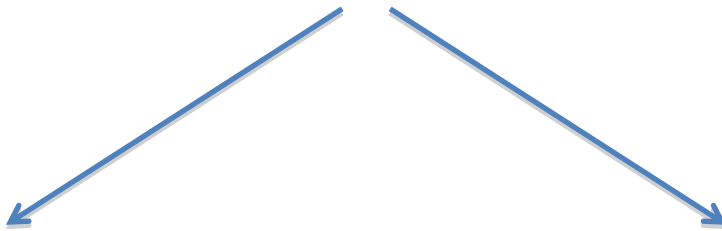

Accidentally Discovered  
Or  
Non-Ruptured GDA Aneurysm

Ruptured GDA Aneurysm

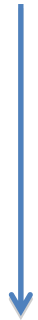

Hemodynamically

Hemodynamically

Stable

Unstable

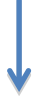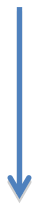

Anatomically Feasible  
**for repair**

Endovascular Repair  
(coil embolization, stent placement)

Open Surgery

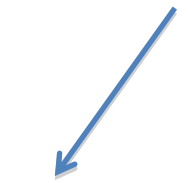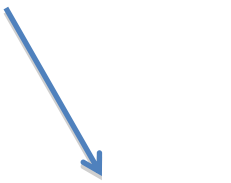

YES

NO or  
Failed Endovascular **repair**

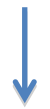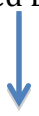

Endovascular  
Repair

Open Surgery
